# Supplementary material
Source: PubMed Central journal article supplement (PMC2628307)
Supplement: NIHMS86347-supplement-1_si_001.pdf [file NIHMS86347-supplement-1_si_001.pdf]

## Supporting Information for:

# A Mechanistic Study of Protein Phosphatase-1 (PP1), A Catalytically Promiscuous Enzyme

### Kinetic Isotope Effect Data Analysis.

For each isotope effect at least three reactions were run. The  $^{15}\text{N}/^{14}\text{N}$  ratios were measured for the product ( $R_p$ ) and of the remaining starting material ( $R_s$ ) at partial reaction, as well as in the original mixture ( $R_o$ ). The isotope effects were calculated using equations 1 and 2.<sup>1</sup>

$$\text{isotope effect} = \log(1 - f) / \log[(1 - f)(R_s / R_o)] \quad (1)$$

$$\text{isotope effect} = \log(1 - f) / \log(1 - f)(R_p / R_o) \quad (2)$$

For each isotope effect the value calculated from  $R_o$  and  $R_p$  (equation 1) and from  $R_o$  and  $R_s$  (equation 2) agreed within experimental error and these were averaged to give the results reported. The  $^{15}\text{N}$  KIE is given directly from these equations. In the  $^{18}\text{O}$  isotope effect experiments the observed KIEs given by the above equations were corrected for the  $^{15}\text{N}$  isotope effect and for incomplete levels of isotopic incorporation.

### Calculation of corrected $^{18}\text{O}$ kinetic isotope effects

In the  $^{18}\text{O}$  isotope effect experiments the observed KIEs were corrected for the  $^{15}\text{N}$  isotope effect and for incomplete levels of isotopic incorporation. The equations used for these corrections and their derivations have been described.<sup>2</sup>

For the labeled substrates and the mixtures used for the  $^{18}k_{ig}$  experiments, the levels of isotopic incorporation and other quantities used in the correction equation were as follows. (Refer to figure 1S.)

#### pNPP

The fraction of  $^{15}\text{N}$ ,  $^{18}\text{O}$ -labeled compound **A** in the remote-labeled mixture of **A** and **C** =  $b = 0.003653$

The fraction of  $^{15}\text{N}$  in the  $^{15}\text{N}$ ,  $^{18}\text{O}$ -labeled compound **A** =  $x = 0.99$ ,

The fraction of  $^{18}\text{O}$  in the  $^{15}\text{N}$ ,  $^{18}\text{O}$ -labeled compound **A** =  $y = 0.9012$

The fraction of  $^{15}\text{N}$  in the  $^{14}\text{N}$ -labeled compound **C** =  $z = 0.0002$

#### pNPMP

The fraction of  $^{15}\text{N}$ ,  $^{18}\text{O}$ -labeled compound **D** in the remote-labeled mixture of **D** and **F** =  $b = 0.003701$

The fraction of  $^{15}\text{N}$  in the  $^{15}\text{N}$ ,  $^{18}\text{O}$ -labeled compound **D** =  $x = 0.99$ ,

The fraction of  $^{18}\text{O}$  in the  $^{15}\text{N}$ ,  $^{18}\text{O}$ -labeled compound **D** =  $y = 0.85$

The fraction of  $^{15}\text{N}$  in the  $^{14}\text{N}$ -labeled compound **F** =  $z = 0.0003$

For the labeled substrates and the mixtures used for the  $^{18}k_{\text{nonbridge}}$  experiments, the levels of isotopic incorporation and other quantities used in the correction equation were as follows.

### pNPP

The fraction of  $^{15}\text{N}$ ,  $^{18}\text{O}$ -labeled compound **B** in the remote-labeled mixture of **B** and **C** =  $b = 0.003699$

The fraction of  $^{15}\text{N}$  in the  $^{15}\text{N}$ ,  $^{18}\text{O}$ -labeled compound **B** =  $x = 0.99$

The fraction of compound **B** with all three nonbridge oxygen atoms labeled =  $y = 0.895$

The fraction of  $^{15}\text{N}$  in the  $^{14}\text{N}$ -labeled compound **C** =  $z = 0.0001$

### pNPMP

The fraction of  $^{15}\text{N}$ ,  $^{18}\text{O}$ -labeled compound **E** in the remote-labeled mixture of **E** and **F** =  $b = 0.003237$

The fraction of  $^{15}\text{N}$  in the  $^{15}\text{N}$ ,  $^{18}\text{O}$ -labeled compound **E** =  $x = 0.99$

The fraction of compound **E** with both nonbridge oxygen atoms labeled =  $y = 0.732$

The fraction of  $^{15}\text{N}$  in the  $^{14}\text{N}$ -labeled compound **F** =  $z = 0.0001$

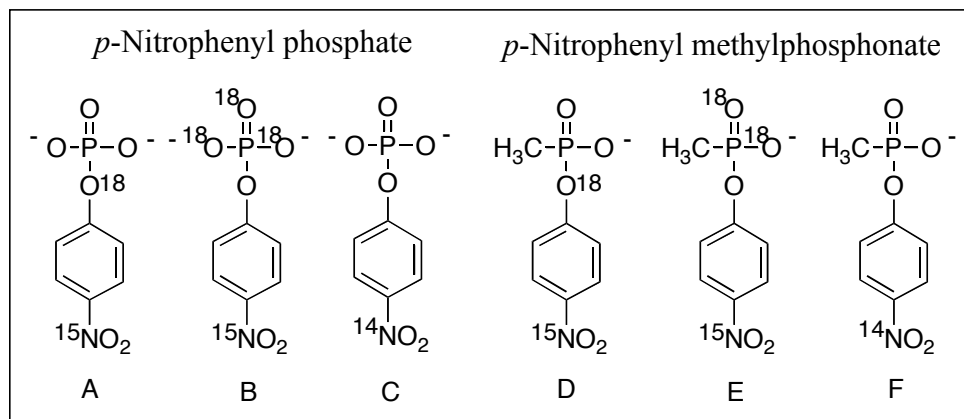

**Figure 1S.** Isotopic Isomers used in KIE Experiments

### References

- (1) Bigeleisen, J.; Wolfsberg, M. *Adv. Chem. Phys.* 1958, *1*, 15-76.
- (2) Cleland, W. W. In *Isotope effects in chemistry and biology*; Kohen, A., Limbach, H.-H., Eds.; CRC Press: Boca Raton, FL, 2006, p 915-930; Hermes, J. D.; Morriscal, S. W.; O'Leary, M. H.; Cleland, W. W. *Biochemistry* 1984, *23*, 5479-88.
